# Supplementary material for: The evolution of duplicate gene expression in mammalian organs
Source: HighWire-hosted journal article supplement (doi:10.1101/gr.215566.116), 2017-07-25
Supplement: Supplemental_Fig_S1.pdf [file Supplemental_Fig_S1.pdf]

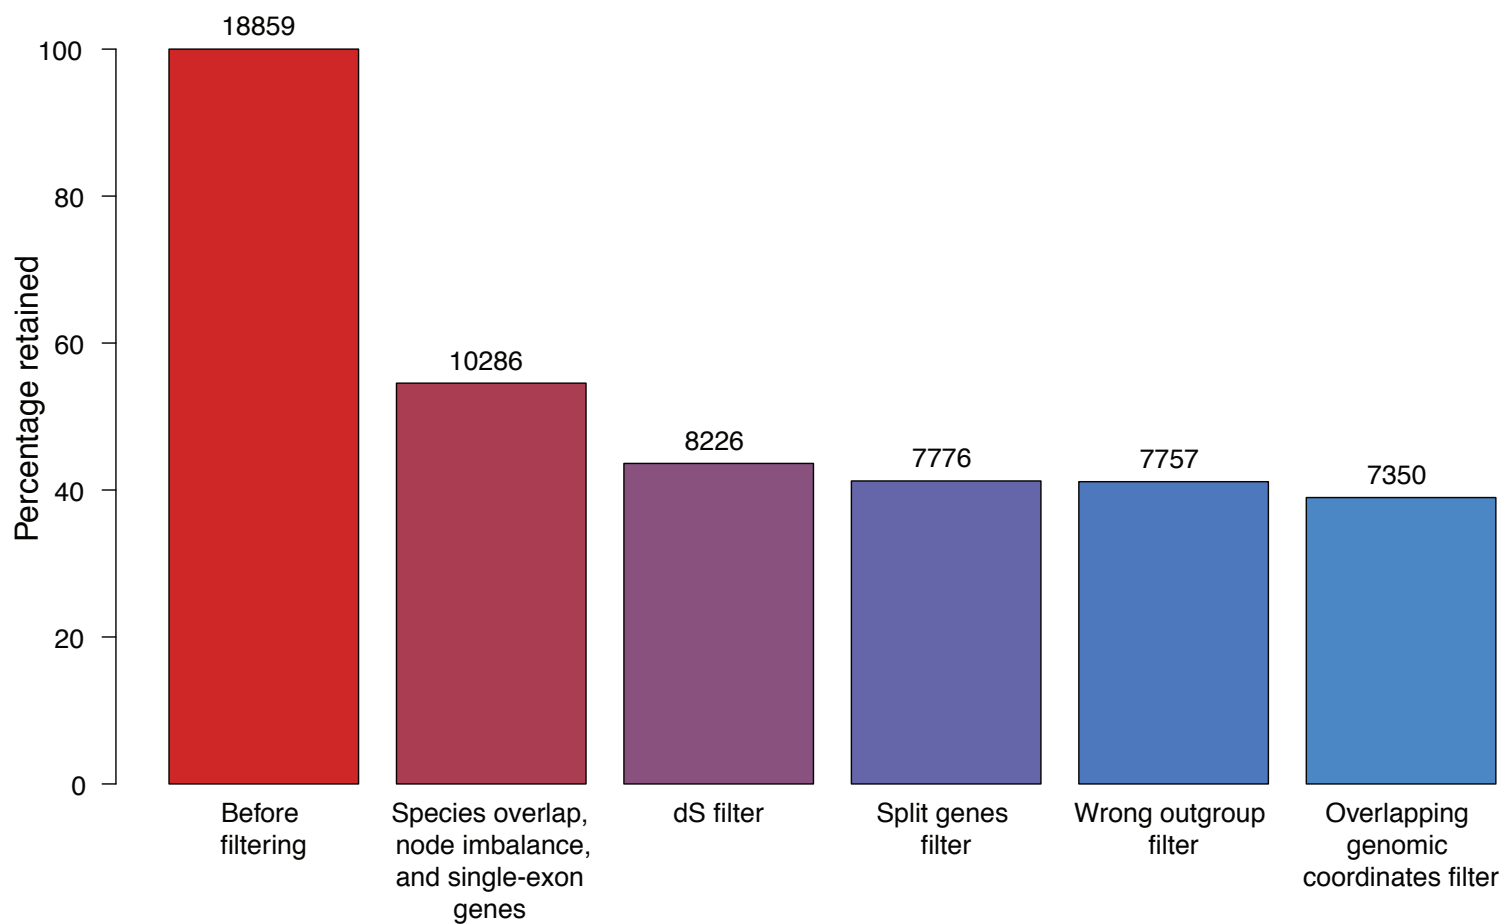

**Supplemental Figure S1: Filtering procedure for the paralog dataset.** The numbers above the bars refer to the number of duplication events retained at each filtering step.
