# Supplementary material for: The evolution of duplicate gene expression in mammalian organs
Source: HighWire-hosted journal article supplement (doi:10.1101/gr.215566.116), 2017-07-25
Supplement: Supplemental_Fig_S3.pdf [file Supplemental_Fig_S3.pdf]

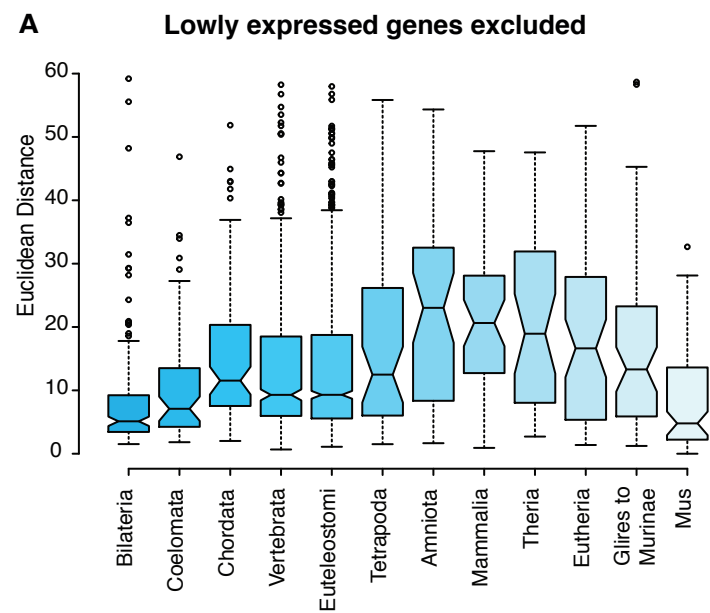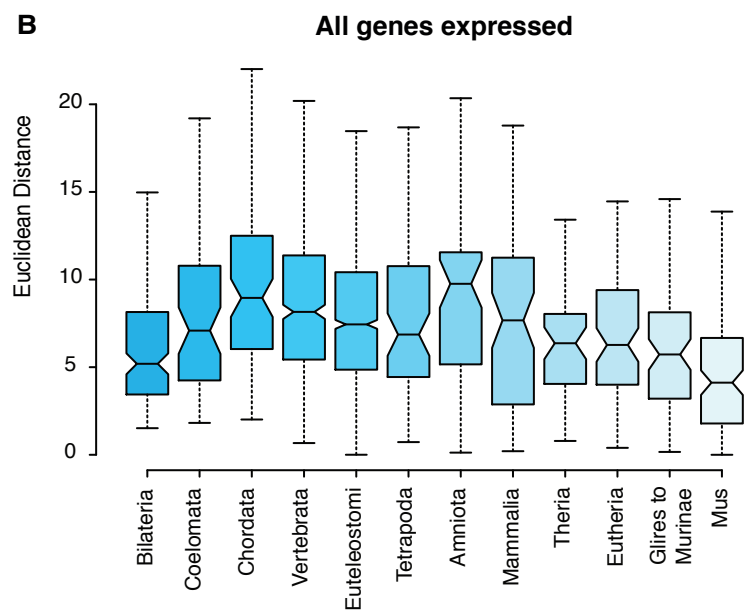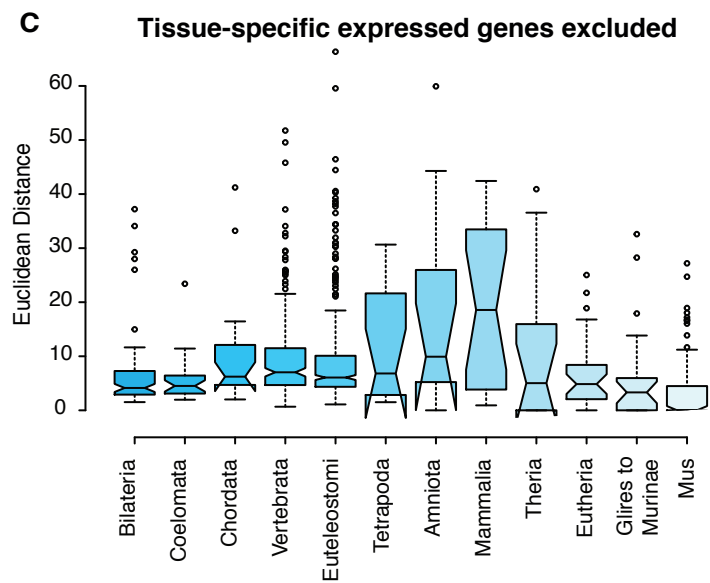

**Supplemental Figure S3: Expression divergence of duplicate genes in mouse, accounting for possible biases.** Expression divergence was measured as Euclidean distances. A) Lowly expressed paralogs with sum of expression across all tissues <1 FPKM were excluded from the analyses. B) We required that all paralogs are expressed in a given tissue when calculating Euclidean distances, effectively removing cases in which any of the paralogs showed 0 expression. C) Tissue-specific expressed genes were removed from the dataset. Tissue specificity was defined as “stringent” (see Methods).
