# Supplementary material for: The evolution of duplicate gene expression in mammalian organs
Source: HighWire-hosted journal article supplement (doi:10.1101/gr.215566.116), 2017-07-25
Supplement: Supplemental_Fig_S5.pdf [file Supplemental_Fig_S5.pdf]

**A****Human-mouse single-copy genes**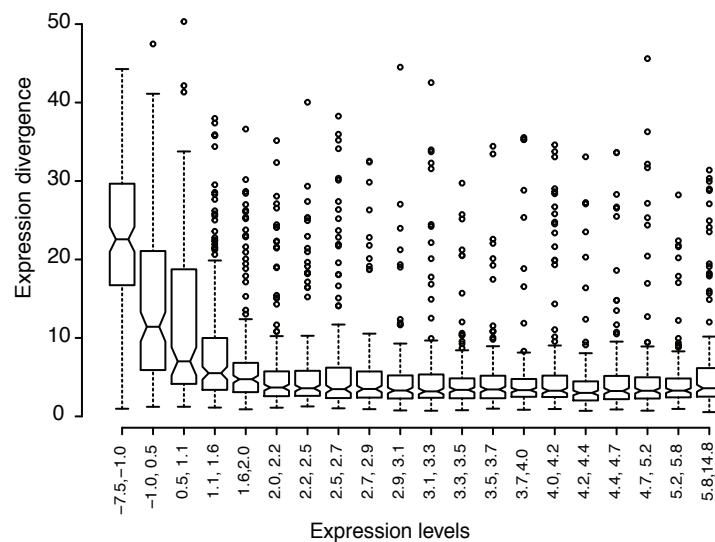**B****Mouse duplicate genes**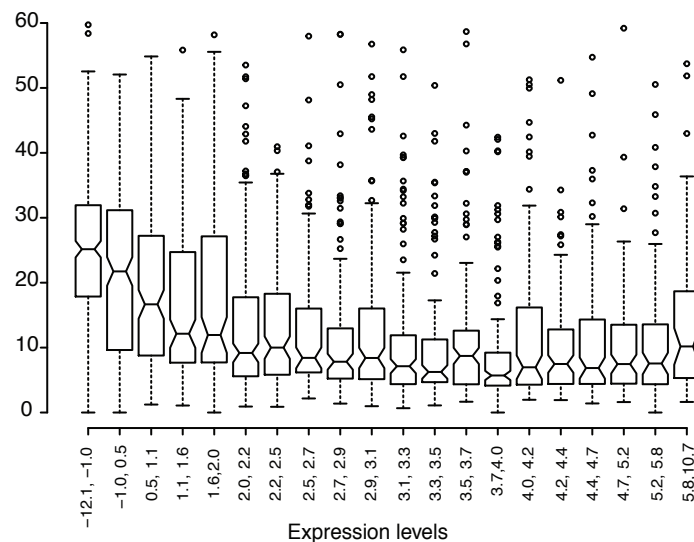

**Supplemental Figure S5: Expression divergence decreases with increasing expression levels in single-copy and duplicate genes.** Expression divergence was measured as average Euclidean distances between human-mouse single-copy genes (A) and mouse paralogs (B) and grouped by expression levels into equally populated bins. Expression levels were calculated as average of  $\log_2$ -transformed means for each gene pair (single-copy genes) or duplication event (paralogs).
