# Supplementary material for: The evolution of duplicate gene expression in mammalian organs
Source: HighWire-hosted journal article supplement (doi:10.1101/gr.215566.116), 2017-07-25
Supplement: Supplemental_Fig_S6.pdf [file Supplemental_Fig_S6.pdf]

# Expression divergence of orthologs and young paralogs

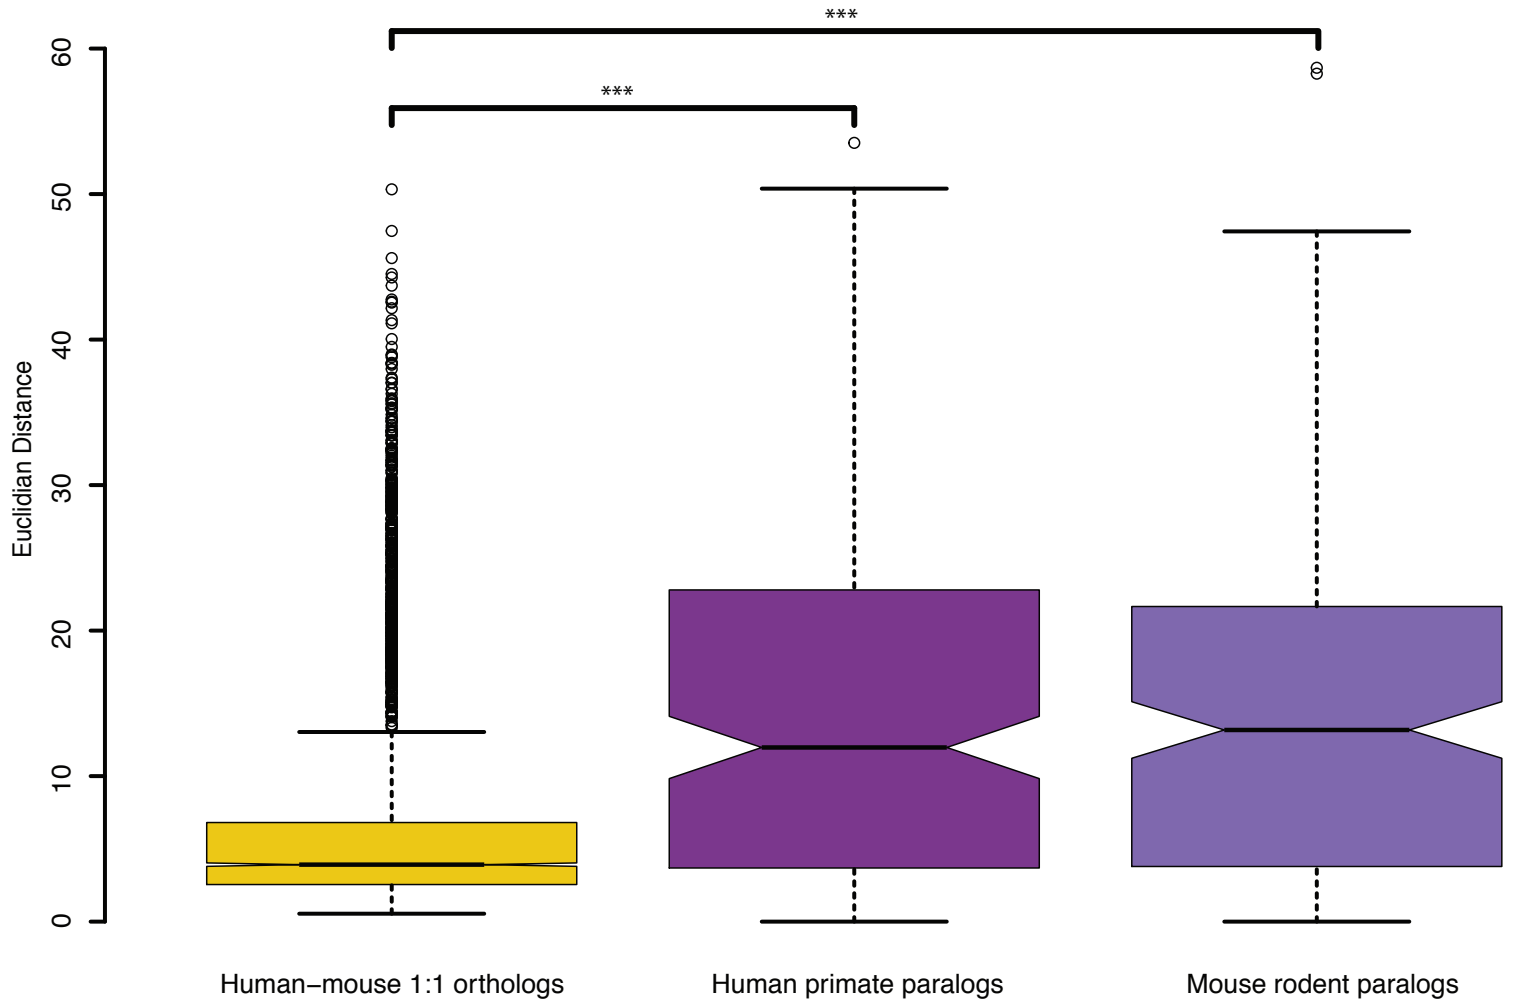

**Supplemental Figure S6: Expression divergence of primate- and rodent-specific paralogs is higher than that of human-mouse single-copy genes.** Human genes that have duplicated along the primate lineage and mouse genes that have duplicated along the rodent lineage and are therefore younger than the 1:1 human-mouse orthologs genes show significantly higher expression divergence ( $P < 10^{-14}$ ).
