# Supplementary material for: The evolution of duplicate gene expression in mammalian organs
Source: HighWire-hosted journal article supplement (doi:10.1101/gr.215566.116), 2017-07-25
Supplement: Supplemental_Fig_S7.pdf [file Supplemental_Fig_S7.pdf]

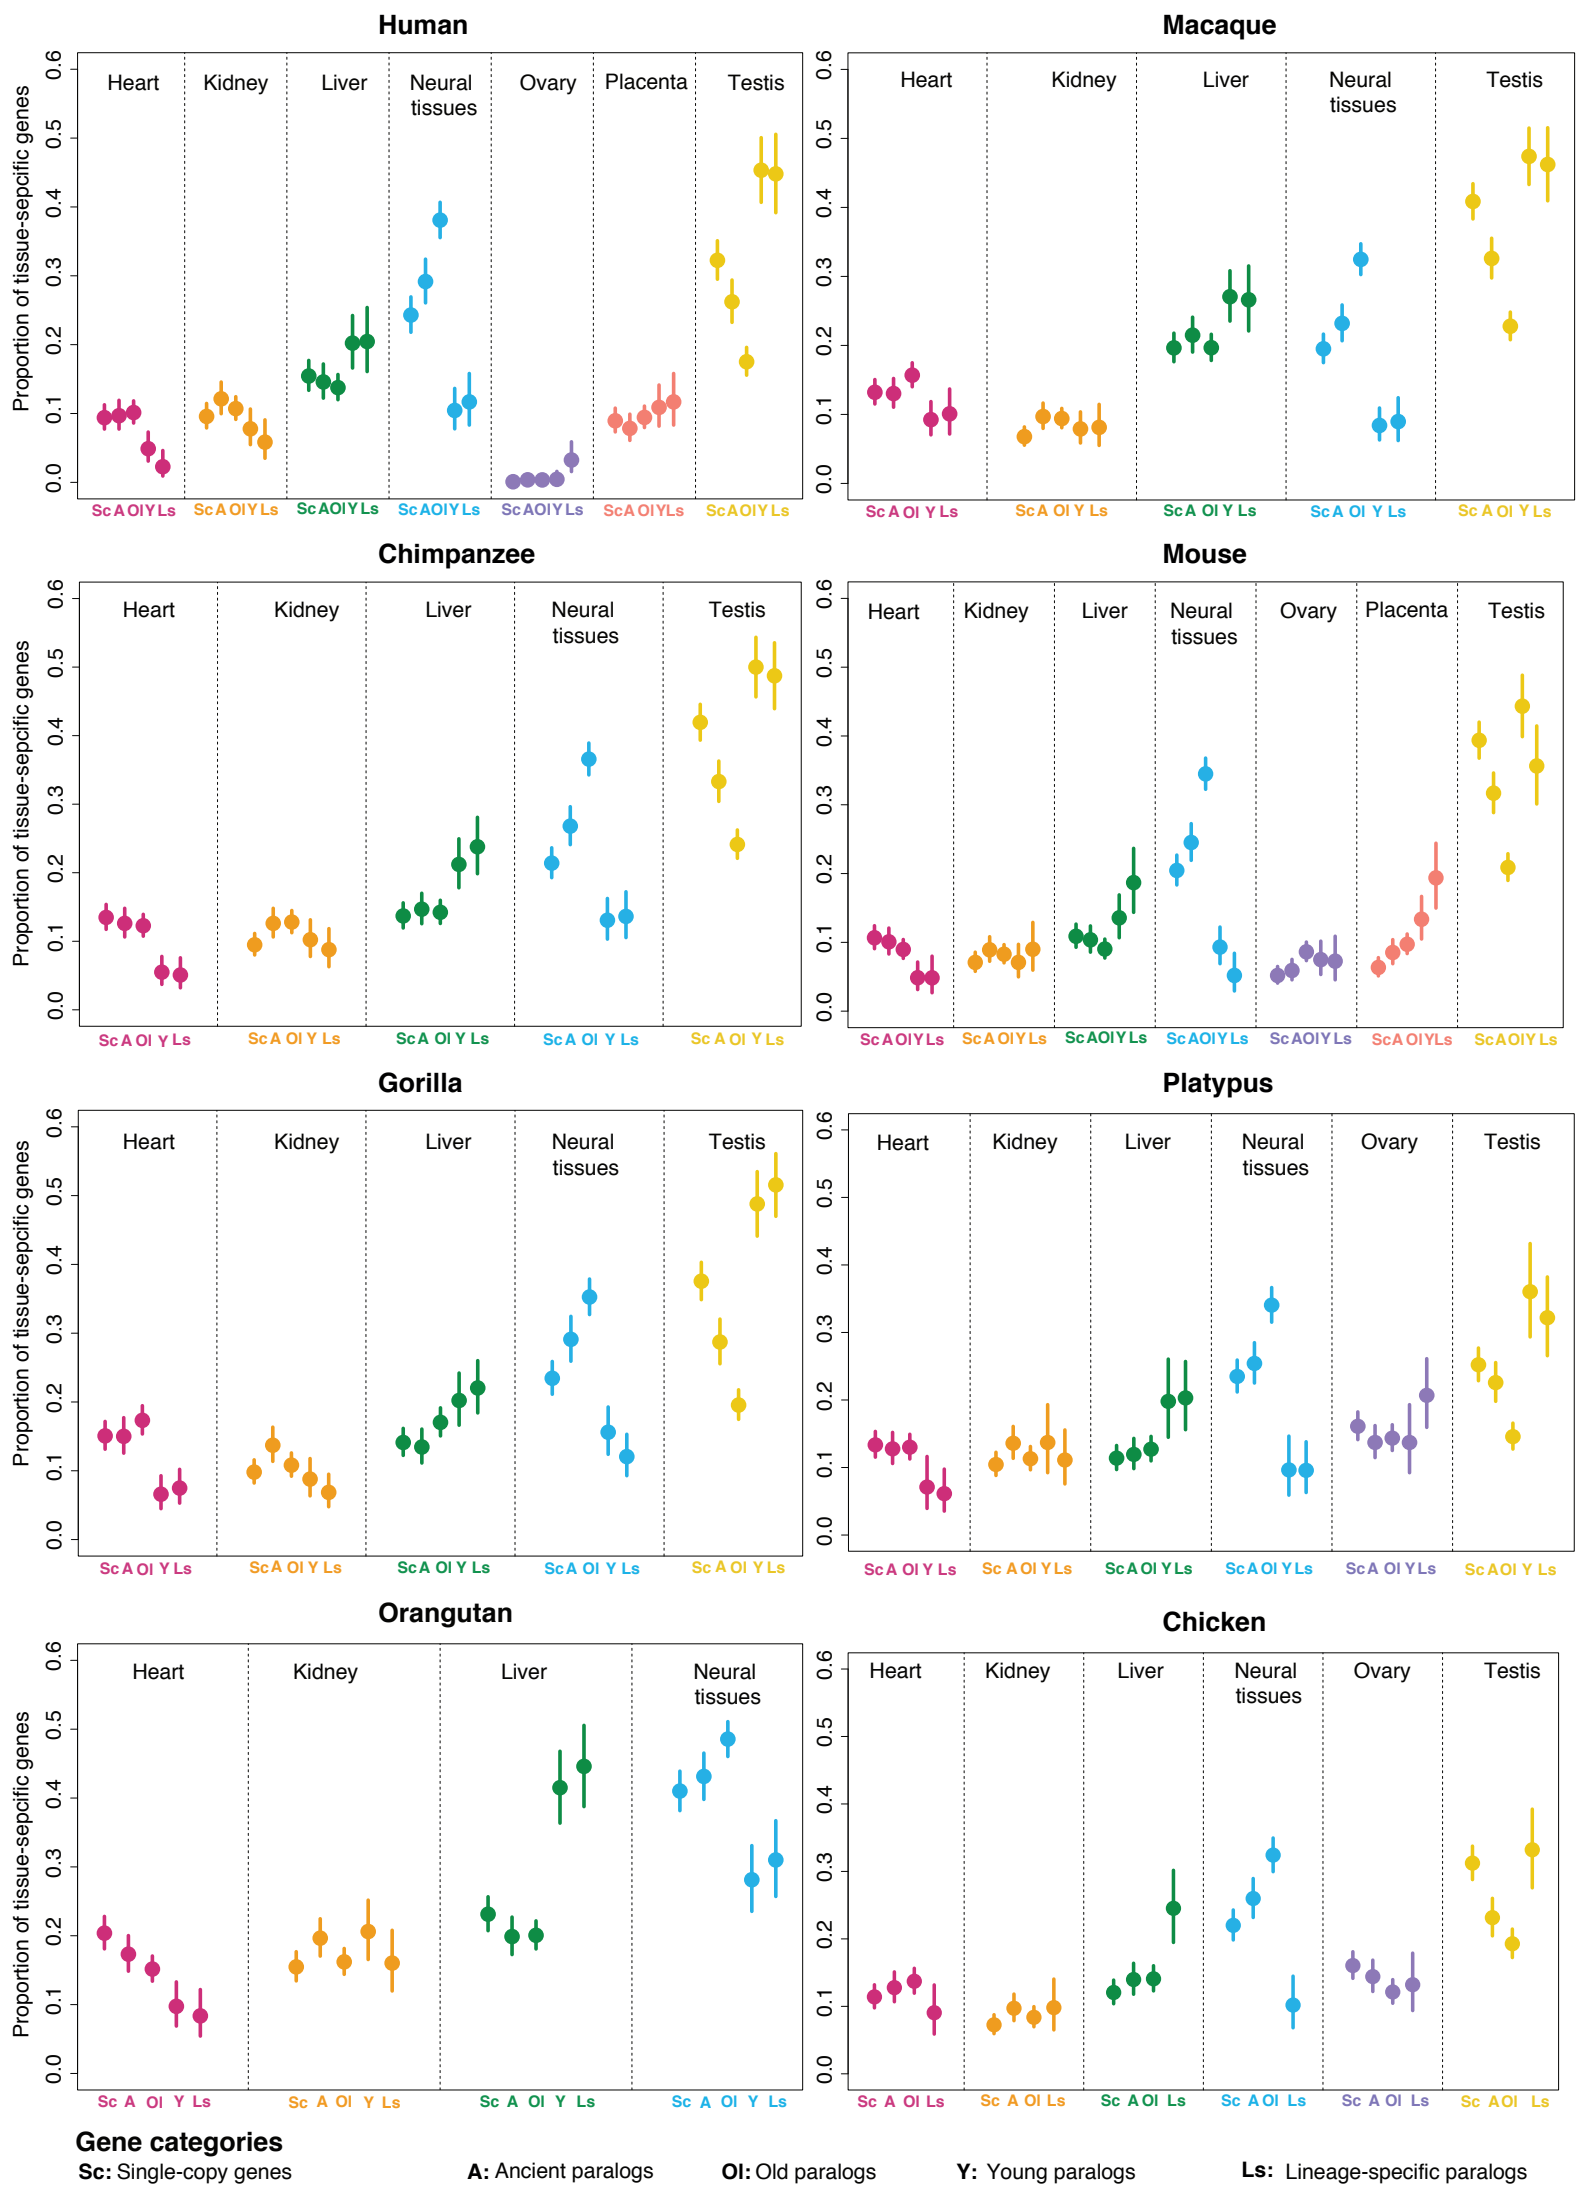

**Supplemental Figure S7: Evolutionary dynamic expression profiles of tissue-specific expressed genes.** Proportion of genes specific to any given tissue is plotted by gene type and duplication age for all studied species at gene level (for opossum see Fig. 4). Tissue specificity was assessed using the “stringent” definition (Methods). Single-copy genes and paralogs, grouped by duplication age, are shown for each tissue. Bars represent 95% confidence intervals.
