# Supplementary material for: The evolution of duplicate gene expression in mammalian organs
Source: HighWire-hosted journal article supplement (doi:10.1101/gr.215566.116), 2017-07-25
Supplement: Supplemental_Fig_S12.pdf [file Supplemental_Fig_S12.pdf]

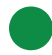

## Liver

### Human

### Platypus

### Mouse

### Chicken

### Opossum

Expression level  $\log_2(\text{mean}(\text{fpkm}))$

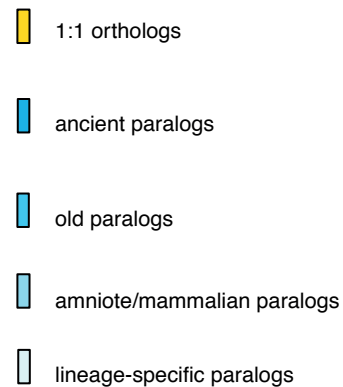

Expression level  $\log_2(\text{mean}(\text{fpkm}))$

**Supplemental Figure S12: Evolutionary dynamics of relative expression of single-copy and duplicate genes grouped in the liver.** Human is shown as the representative of primates. Genes in each species were group by expression level into six equally populated bins and relative liver expression was calculated (Methods). In human, mouse, and opossum seven organs were studied (cortex and cerebellum were treated as a single organ, neural tissues, Methods). Therefore, a value above 0.29 signifies a highly tissue-specific gene, according to one of our definitions of tissue specificity (Methods). In platypus and chicken, six organs were studied and therefore, a value above 0.34 signifies a highly tissue-specific gene. Single copy genes are yellow, whereas paralogs are grouped into four duplication age classes (Methods) and depicted in shades of blue.
