# Supplementary material for: The evolution of duplicate gene expression in mammalian organs
Source: HighWire-hosted journal article supplement (doi:10.1101/gr.215566.116), 2017-07-25
Supplement: Supplemental_Fig_S13.pdf [file Supplemental_Fig_S13.pdf]

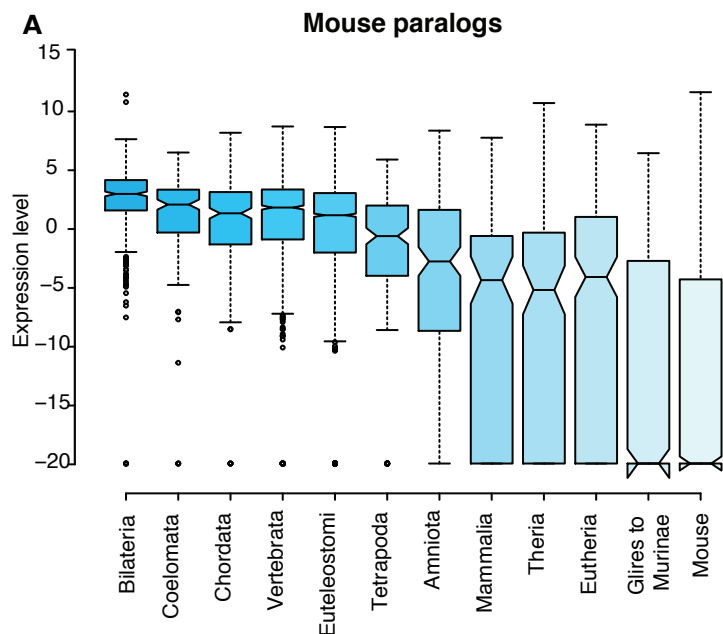

**Supplemental Figure S13: Expression levels of mouse paralogs** by duplication age, including multi-exon and single-exon genes. Known retrogene (Carelli et al. 2016) were excluded from the list of single-exon genes. Note that single-exon genes are lowly expressed or not expressed at all, poorly annotated (lacking UTR annotation), and/or potentially nonfunctional genes (pseudogenes), many of which belong to one large family (GPCR)/sub-family (olfactory receptor OR genes) (Methods). They are enriched among lineage-specific young paralogs.
