# Supplementary material for: The evolution of duplicate gene expression in mammalian organs
Source: HighWire-hosted journal article supplement (doi:10.1101/gr.215566.116), 2017-07-25
Supplement: Supplemental_Methods.docx [file Supplemental_Methods.docx]

**Supplemental Methods**

**The evolution of duplicate gene expression in mammalian organs**

Katerina Guschanski, Maria Warnefors, Henrik Kaessmann

**Refinement of the duplication dataset**

First, for each identified duplication event we calculated the proportion of species present in both daughter clades - the species overlap score. We required an overlap of at least 25% or at least seven species in common. This cut-off closely follows the rules of the Ensembl database, which classifies genes resulting from a duplication event with less than 25% species overlap as “possible orthologs” (Ensembl online documentation). We also determined a node imbalance score by calculating the ratio between the number of species in each daughter clade. If the smaller daughter clade had less than 7 species and/or the ratio was below 0.25, the duplication was considered unreliable. Less stringent cut-offs produced an increased number of false-positive duplications. If a duplication event was immediately followed by another round of duplications without being interrupted by a speciation event (serial duplications) and node imbalance was higher than the cut-off, a higher order node was considered and paralogs resulting from the “unreliable” duplication were discarded. These filtering steps were applied to the entire set of species (n=61) available in Ensembl v64 (Flicek et al. 2012). All subsequent filtering steps used only the study species. We removed all intronless genes (i.e., genes annotated with a single exon) from our dataset, given that these either stem from RNA-based duplication, a specific process treated in detail elsewhere (Carelli et al. 2016), or typically represent poorly annotated (potentially nonfunctional/pseudogenic) paralogs that are members of multi-exonic gene families. In particular, olfactory receptors and other GPCR family members are known to consist of a single coding exon, but in addition they also contain one or several untranslated region (UTR) exons/introns (i.e., functional/well-annotated members are not intronless) (Grzybowska 2012; Olender et al. 2016). However, if poorly annotated, they will appear as intronless genes. Indeed, an analysis of the single-exon set from which known retrocopies were removed (Carelli et al. 2016) was highly enriched in sensory, in particular olfactory functions (Supplemental Table S12). Including single-exon genes in our dataset resulted in extremely low expression levels among young paralogs (Supplemental Fig S13), likely reflecting the poor annotation of such genes and their enrichment with non-functional paralogs. After implementation of these filtering steps, we retained 10286 duplication events in the dataset (Supplemental Fig S1).

Second, to independently date duplication events we estimated the number of synonymous substitutions per synonymous site (*d*S) for each paralog pair between the daughter clades resulting from a given duplication event. In serial duplications, *d*S values were calculated across all daughter clades. This approach effectively requires the presence of at least one pair of paralogs, within or across species, that resulted from a given duplication event and have not undergone subsequent duplications. For each duplication event, we aligned the longest coding sequence of each paralog with PRANK v.100701 (Löytynoja and Goldman 2008) and calculated pairwise *d*S values with *codeml*, which is part of the PAML package (Yang 2007). Pairwise *d*S values were also calculated for 3749 1:1 amniote orthologs (Warnefors and Kaessmann 2013). This allowed us to define expected levels of sequence divergence for genes of a given evolutionary age. For paralogs of any given duplication age we set the cut-off to the 95% confidence interval of the corresponding orthologous *d*S values and allowed a margin of ¼ of this value, to account for potential greater divergence of paralogs compared to orthologs. By applying this approach we used the following reasoning: A species-specific duplication is unlikely to result in genes that show higher *d*S (allowing for margins) than those found for 1:1 orthologs between the focal species and its sister species. Duplication events with gene family tree-based duplication ages that strongly deviated from *d*S-based estimates were removed from subsequent analyses and after this filtering step we retained 8226 duplication events (Supplemental Fig S1).

Third, a number of paralogs in Ensembl v64 gene family trees are the result of so-called split genes. These genes are usually found in low-quality, fragmented genome assemblies (e.g. platypus), have no or little overlap between gene fragments, and are located on different contigs. They only occur as species-specific duplications. To remove these genes from further analyses we evaluated the quality of local protein sequence alignments for species-specific paralogs using the Smith-Waterman algorithm (Smith and Waterman 1981; Pearson 1991). We empirically defined lineage-specific alignment score cut-offs based on eVal, which took into account evolutionary time (i.e. branch length), during which duplication that would be classified as species-specific could have happened. Different cut-offs were evaluated manually by verifying the true split-gene nature of the filtered genes. Final eVal values were as follows: eValChicken=1x10-4, eValPlatypus=6x10-6, eValOpossum=1x10-8, eValMouse_and_primates =1x10-10. Paralogs with alignment score above these cut-offs and lower than 30% identity were checked manually, verified as split genes, and removed from further analyses (Supplemental Fig S1). Split genes were found in four genomes (platypus n=440, opossum n=40, chicken n=19 and macaque n=2). No split genes were found in other species and the retained number of duplication events was 7776 (Supplemental Fig S1).

Fourth, we consolidated the ages of duplication events with their respective outgroups. For instance, if according to the gene family tree a duplication event has happened in the common ancestor of eutherians, speciation events prior to the duplication are not expected to contain any eutherian taxa. However, in a number of duplications inappropriate outgroup taxa were identified and such duplication events were removed from further analyses, so that our dataset numbered 7757 duplication events (Supplemental Fig S1).

Finally, we removed falsely annotated gene duplicates by crossing the genomic coordinates of all lineage-specific paralogs within each genome. This was motivated by the discovery of a number of annotated protein-coding paralogs with overlapping genomic coordinates. Upon further investigation we found that such paralogs are frequently only supported by transcriptional evidence, constituting transcript isoforms of the same gene or a gene and a read-through product. Relatively larger proportions of such false paralogs were found in genomes with rich transcriptional data, such as human and mouse (244 and 135 genes, respectively) compared to orangutan or platypus (14 and 19 genes, respectively). These genes were removed from further analyses. Our final dataset consisted of 66587 paralogs contained in 7350 duplication events (Supplemental Fig S1).

**Estimating expression values for closely related paralogs**

Although Cufflinks implements an algorithm to solve read mapping ambiguities, closely related duplicates might not be divergent enough to have acquired a sufficient number of nucleotide changes to inform the algorithm. Furthermore, it was recently shown that common methods for gene expression estimates from RNA-Seq data, including the one used in our study, can produce erroneous expression estimates (Robert and Watson 2015). To evaluate whether the expression profiles of an inter-species paralog pair can be distinguished, we calculated expression divergence for paralogs as Euclidean distances relying on unambiguously mapped reads only and on all mapped reads. If in a pair of paralogs one of the genes has no unique positions, its expression will be 0 using only unambiguously mapped reads, but above 0 using all reads. We calculated the ratio of Euclidean distances between paralogs using all reads and only unique reads. Paralogs with expression profiles that fell within the empirically validated ratio interval of 0.5-1.2 (all reads/unique reads) were considered to be reliably distinguishable. Manual examination of paralog pairs with ratios above and below the threshold showed them to be limited to very young and therefore weakly-diverged duplicates. These paralogs were retained in the dataset, but flagged as not having reliable expression values and not used in analyses that required gene-specific expression values. We note that this procedure requires at least two within-species paralogs stemming from the same duplication event without subsequent duplications.

We validated our approach of flagging paralogs with unreliable expression values against a dataset of human genes (n=372), for which expression levels cannot be reliably estimated with the combination of methods used in our study (TopHat and Cufflinks, including multi-read correction, (Robert and Watson 2015)). Of these problematic genes, 83 were present in our filtered duplication dataset, whereas others were excluded during various filtering steps, as described above. Our method of flagging paralogs effectively filtered out 51 (61.45%) problematic genes (in total, 91.4% of problematic genes were removed or flagged). The remaining 32 genes (8.6% of the total list) make up only 0.045% of all human paralogs in our dataset. Flagged genes and gene families in all species were only used for analyses that did not require knowledge of gene-specific expression levels. Hence, although individual gene expression estimates for these genes might be biased in our dataset, performing gene family level analyses on these genes is reminiscent of the “multi-map groups” method proposed by Robert and Watson (2015).

**Expression analysis of neural tissues**

Expression profiles of the two neural tissues used in our study, cortex and cerebellum, are highly correlated and therefore we first computed the mean of their expression for each gene, effectively merging them into a single tissue. To validate our results, we also performed the analyses for brain and cerebellum separately. Treating brain and cerebellum as separate tissues, we could detect additional genes characterized as brain- or cerebellum-specific (e.g. 168 and 82 brain-specific, and 172 and 37 cerebellum-specific paralogs in human, with two different measures of tissue specificity [“twice uniform expression” and tau, respectively, see below]). However, using this approach a number of genes recognized as neural tissue-specific remained undetected (21 and 87 with the two different measures of tissue specificity, as above). Importantly, combining brain and cerebellum or treating them as separate tissues did not change inferences of function enrichment among neural tissue-specific expressedgenes (Supplemental Table S13).

**Estimating expression divergence for analysis of correlation between expression and protein sequence divergence**

Expression divergence was calculated as Euclidean distances across all tissues in a pairwise manner for each paralog within a species and each duplication event. Duplication events were defined topologically by examining gene trees and serial duplication events were retained, so that expression divergence was calculated across all within-species paralog pairs resulting from such event. To avoid biases in expression divergence estimates that can arise if one of the paralogs has undergone subsequent duplications, we only considered events with at least two paralogs of the same duplication age. For single copy genes we considered species pairs. We excluded gene pairs in which none of the paralogs were expressed and those, in which the expression profiles of paralogs could not be determined with certainty (either one or both paralogs had no diagnostic sites and therefore no unique reads, see above).

**Tissue specificity, expression levels and duplication age**

To evaluate if tissue specificity changes with expression level and duplication age, we defined six equally populated groups of genes (bins) according to their expression level. For each tissue we plotted relative tissue expression for single-copy genes and paralogs grouped by duplication ages within expression level bins (Supplemental Figs S9-12).
